# Supplementary material for: Bridging intravenous thrombolysis in patients with atrial fibrillation
Source: PubMed Central journal article supplement (PMC9382124; doi:10.3389/fneur.2022.945338), 2022-08-03
Supplement: Data_Sheet_1.pdf [file Data_Sheet_1.pdf]

## *Supplementary Material*

### **1 Table of Contents**

- List of all BEYOND-SWIFT Investigators
- Supplementary Table 1 BEYOND-SWIFT Registry Overview
- Supplementary Table 2 Cohort Characteristics Stratified by Diagnosis of Atrial Fibrillation
- Supplementary Table 3 Baseline Factors of Patients Who Have and Did Not Have Follow-Up Examination Three Months After the Indexed Event
- Supplementary Table 4 Unadjusted Analysis With Symptomatic Intracranial Hemorrhage as the Outcome Variable
- Supplementary Table 5 Analysis With Symptomatic Intracranial Hemorrhage as the Outcome Variable Unadjusted for Oral Anticoagulants
- Supplementary Table 6 Sensitivity Analysis of International Normalized Ratio on Outcome of Patients Under Vitamin-K Antagonist Therapy
- Supplementary Table 7 Ordinal Regression With Modified Rankin Scale Score at 3 months as the Outcome Variable
- Supplementary Table 8 Main Outcomes of Interest With Excluded Patients From One Center Which Was Not Part of the BEYOND-SWIFT Registry
- Supplementary Table 9 Regression Models for Main Outcomes of Interest With Added TICI Score

**2 List of all BEYOND-SWIFT Investigators**

BEYOND-SWIFT (Bernese-European Registry for Ischemic Stroke Patients Treated Outside Current Guidelines With Neurothrombectomy Devices Using the SOLITAIRE FR With the Intention for Thrombectomy) investigators: Leonidas Panos, MD, Department of Neurology, University Hospital Bern, Inselspital, University of Bern, Bern, Switzerland; Panagiotis Chaloulos-Iakovidis, MD, Department of Neurology, University Hospital Bern, Inselspital, University of Bern, Bern, Switzerland; Alex Brehm, MD, Department of Neuroradiology, Clinic of Radiology & Nuclear Medicine, University Hospital Basel, Basel, Switzerland; Marc Ribo, MD, and Manuel Requena, MD, Department of Neurology, Vall d'Hebron University Hospital, Barcelona, Spain; Steven D. Hajdu, MD, Department of Radiology, CHUV Lausanne, Laussane, Switzerland; Amel Benali, MSc, Department of Neuroradiology, CHU Montpellier, Montpellier, France; Benjamin Friedrich, MD, Department of Diagnostic and Interventional Neuroradiology, Klinikum rechts der Isar, Technical University Munich, Munich, Germany; Joanna Schaafsma, MD, Department of Neurology, Toronto Western Hospital, Ontario, Canada; Matthias Gawlitza, MD, Department of Neuroradiology, CHU Reims, Reims, France; Jan Liman, MD, Department of Neurology, University Medical Center Gottingen, University of Gottingen, Gottingen, Germany.

3 Supplementary Table 1 BEYOND-SWIFT Registry Overview

| Center                                                                                       | N           | Time period | LVO anterior circulation (ICA, M1, M2) | Lost to follow-up (mRS day 90) | ASPECTS available (LVO anterior circulation) | % MRI as initial imaging modality | ASPECTS grading                                                 | Admission and 24h NIHSS             | mRS at 90 days                                                                                                                                                                 | TICI grading                              | EC approval | Responsible EC                                                                   |
|----------------------------------------------------------------------------------------------|-------------|-------------|----------------------------------------|--------------------------------|----------------------------------------------|-----------------------------------|-----------------------------------------------------------------|-------------------------------------|--------------------------------------------------------------------------------------------------------------------------------------------------------------------------------|-------------------------------------------|-------------|----------------------------------------------------------------------------------|
| Inselspital Bern, University Hospital Bern, University of Bern, Bern, Switzerland            | 1317        | 2010-2018   | 90.8% (1195/1317)                      | 6.1% (80/1317)                 | 97.7% (1168/1195)                            | 48.5% (637/1317)                  | Research fellow blinded to clinical data                        | Board certified stroke neurologists | Stroke neurologists on scheduled clinical visits. Structured telephone interviews if the patient was unable to attend (either by physician or mRS certified stroke nurse).     | Operator-measured                         | Yes         | Kantonale Ethik Kommission Bern                                                  |
| Toronto Western Hospital - University Health Network, University of Toronto, Toronto, Canada | 60          | 2014-2017   | 88.3% (53/60)                          | 0% (0/60)                      | 53/53                                        | 1.7% (1/60)                       | Prospective, by neuroradiologist                                | Board certified stroke neurologists | Clinical visits at the university hospital. For patients still in rehabilitation facilities, a mRS certified nurse schedules telephone interviews.                             | Operator-measured                         | Yes         | IRB Toronto                                                                      |
| Klinikum rechts der Isar, Technical University Munich, Munich, Germany                       | 206         | 2009-2017   | 74.3% (153/206)                        | 18.4% (38/206)                 | 151/153                                      | 2.4% (5/206)                      | Retrospective by neuroradiologist                               | Board certified stroke neurologists | mRS was evaluated either by face-to-face assessments (by stroke neurologists) or standardized telephone interviews (by certified study nurses).                                | Operator Measured                         | Yes         | Ethikkommission der medizinischen Fakultät der Technischen Universität München   |
| University Hospital Vall d'Hebron, Barcelona, Spain                                          | 418         | 2010-2017   | 85.7% (359/419)                        | 20.0% (84/419)                 | 319/360                                      | 0% (0/491)                        | Prospective, by neurologist/neuroradiologist on call            | Board certified stroke neurologists | Stroke neurologists on scheduled clinical visits. Structured telephone interviews if unable to attend.                                                                         | Operator Measured                         | Yes         | CEIC H. Vall d'Hebrond                                                           |
| CHUV, Lausanne University Hospital, Lausanne, Switzerland                                    | 139         | 2012-2017   | 124/139 (89.2%)                        | 26.6% (37/139)                 | 113/124                                      | 0.1% (1/139)                      | Consensus stroke neurologist and neuroradiologist (not blinded) | Board certified stroke neurologists | mRS was assessed by Rankin-certified physicians at 3 months in the outpatient clinic, or alternatively through a structured telephone interview by Rankin-certified personnel. | Operator-measured                         | Yes         | Commission Ethique de Recherche, Canton de Vaud                                  |
| Montpellier CHU, University Hospital Montpellier, Montpellier, France                        | 149         | 2015-2017   | 97.3% (145/149)                        | 4.0% (6/149)                   | 109/145                                      | 82.1% (96/117)                    | Operator-measured                                               | Board certified stroke neurologists | Stroke neurologists on scheduled clinical visits. Structured telephone interviews if unable to attend.                                                                         | Operator-measured                         | (Yes)       | Consent was waived owing to the retrospective design (favorable opinion by CNIL) |
| CHU Reims, University Hospital Reims, Reims, France                                          | 108         | 2013 - 2017 | 90.7% (98/108)                         | 0% (0/108)                     | 96/98                                        | 92.6% (100/108)                   | Retrospective, certified neuroradiologist                       | Board certified stroke neurologists | Stroke physician on clinical visits at university hospital or remote outpatient center.                                                                                        | Retrospective, certified neuroradiologist | (Yes)       | Consent was waived owing to the retrospective design                             |
| <b>Non-BEYOND center in this publication</b>                                                 |             |             |                                        |                                |                                              |                                   |                                                                 |                                     |                                                                                                                                                                                |                                           |             |                                                                                  |
| University Hospital Göttingen, Göttingen, Germany                                            | 547         | 2015-2019   | 88.7% (477/547)                        | 15.4% (84/547)                 | 89.1% (425/477)                              | 0% (0/547)                        | Retrospective certified neuroradiologist                        | Board certified stroke neurologists | Stroke physician on clinical visits at university hospital or telephone interview                                                                                              | Retrospective, certified neuroradiologist | Yes         | Ethik Kommission (UMG)                                                           |
| <b>Total</b>                                                                                 | <b>2944</b> |             |                                        |                                |                                              |                                   |                                                                 |                                     |                                                                                                                                                                                |                                           |             |                                                                                  |

Adapted from Kaesmacher et al with permission. Copyright © 2020, The Authors (CC-BY).

## 4 Supplementary Table 2 Cohort and Outcome Characteristics Stratified by Diagnosis of Atrial Fibrillation.

| Variable                                                    |        | Missing n(%) | Overall         | Without AF     | With AF         | p      |
|-------------------------------------------------------------|--------|--------------|-----------------|----------------|-----------------|--------|
| N (%)                                                       |        |              | 2,941           | 1,594 (54.2)   | 1,347 (45.8)    |        |
| Age on admission (median [IQR])                             |        |              | 74 [62, 82]     | 70 [58, 79]    | 78 [69, 84]     | <0.001 |
| Sex (Female %)                                              |        |              | 1487 (50.6)     | 726 (45.5)     | 761 (56.5)      | <0.001 |
| Type of admission (Direct %)                                |        | 3 (0.1)      | 1714 (58.3)     | 942 (59.1)     | 772 (57.4)      | 0.361  |
| Pre-stroke independence (mRS ≤ 2)                           |        | 348 (11.8)   | 2341 (90.3)     | 1318 (92.1)    | 1023 (88.0)     | 0.001  |
| NIHSS on admission (median [IQR])                           |        | 46 (1.6)     | 16 [10, 20]     | 15 [9, 19]     | 16 [11, 20]     | <0.001 |
| Anticoagulation (%)                                         | None   | 156 (5.3)    | 2336 (83.9)     | 1392 (92.9)    | 944 (73.4)      | <0.001 |
|                                                             | DOAC   |              | 111 (4.0)       | 44 (2.9)       | 67 (5.2)        |        |
|                                                             | VKA    |              | 338 (12.1)      | 63 (4.2)       | 275 (21.4)      |        |
| Antiplatelet (%)                                            | None   | 150 (5.1)    | 1909 (68.4)     | 1040 (9.4)     | 869 (67.3)      | 0.486  |
|                                                             | Mono   |              | 834 (29.9)      | 434 (29.0)     | 400 (31.0)      |        |
|                                                             | Dual   |              | 48 (1.7)        | 25 (1.7)       | 23 (1.8)        |        |
| Statins (Yes %)                                             |        | 362 (12.3)   | 777 (30.1)      | 391 (28.4)     | 386 (32.1)      | 0.044  |
| Diabetes (Yes %)                                            |        | 44 (1.5)     | 566 (19.5)      | 281 (18.0)     | 285 (21.3)      | 0.029  |
| Hypertension (Yes %)                                        |        | 42 (1.4)     | 1997 (68.9)     | 1008 (64.7)    | 989 (73.8)      | <0.001 |
| Dyslipidemia (Yes %)                                        |        | 59 (2)       | 1416 (49.1)     | 798 (51.5)     | 618 (46.4)      | 0.006  |
| Smoking (Yes %)                                             |        | 131 (4.5)    | 702 (25.0)      | 479 (31.6)     | 223 (17.3)      | <0.001 |
| Previous stroke (Yes %)                                     |        | 464 (15.8)   | 344 (13.9)      | 170 (12.4)     | 174 (15.7)      | 0.018  |
| Systolic blood pressure on admission (mmHg) (median [IQR])  |        | 779 (26.5)   | 150 [131, 168]  | 150 [130, 168] | 150 [133, 167]  | 0.464  |
| Diastolic blood pressure on admission (mmHg) (median [IQR]) |        | 786 (26.7)   | 80 [70, 92]     | 80 [70, 90]    | 81 [70, 94]     | 0.001  |
| Glucose on admission (mmol/L) (median [IQR])                |        | 727 (24.7)   | 7.1 [6.0, 10.3] | 7 [5.9, 10.1]  | 7.4 [6.1, 10.7] | <0.001 |
| INR on admission (median [IQR])                             |        | 968 (32.9)   | 1.02 [1, 1.1]   | 1 [1, 1.1]     | 1.06 [1, 1.2]   | <0.001 |
| Platelet count on admission (median [IQR])                  |        | 823 (28)     | 219 [176, 267]  | 223 [182, 269] | 212 [171, 264]  | 0.007  |
| IVT (Yes %)                                                 |        |              | 1432 (48.7)     | 800 (50.3)     | 632 (46.9)      | 0.075  |
| Final TICI score                                            | 0 – 2a |              | 476 (16.2)      | 192 (14.3)     | 284 (17.9)      | 0.032  |
|                                                             | 2b - 3 |              | 2452 (83.7)     | 1152 (85.7)    | 1300 (82.0)     |        |
| <b>OUTCOME</b>                                              |        |              |                 |                |                 |        |
| sICH (Yes %)                                                |        | 31 (1.1)     | 163 (5.6)       | 91 (5.8)       | 72 (5.4)        | 0.733  |
| mRS score 0-2 at 3 months (Yes %)                           |        | 652 (22.2)   | 968 (42.3)      | 550 (44.8)     | 418 (39.4)      | 0.012  |
| Mortality (Yes %)                                           |        | 1113 (37.8)  | 462 (25.3)      | 256 (25.4)     | 206 (25.1)      | 0.914  |

AF: Atrial Fibrillation; NIHSS: National Institutes of Health Stroke Scale; DOAC: Direct Oral Anticoagulants; VKA: Vitamin-K Antagonists; INR: International Normalized Ratio; IVT: Intravenous Thrombolysis; TICI: Thrombolysis in Cerebral Infarction; sICH: symptomatic intracranial hemorrhage; mRS: modified Rankin Scale.

5 Supplementary Table 3 Baseline Factors of Patients Who Have and Did Not Have Follow-Up Examination Three Months After the Indexed Event

| Variable                                                    |        | Missing n (%) | 90-Day Mortality   |                   |                       |        | 90-Day mRS 0-2     |                    |                       |       |
|-------------------------------------------------------------|--------|---------------|--------------------|-------------------|-----------------------|--------|--------------------|--------------------|-----------------------|-------|
|                                                             |        |               | Overall            | Have Follow-Up    | Do Not Have Follow-Up | p      | Overall            | Have Follow-Up     | Do Not Have Follow-Up | p     |
| N                                                           |        |               | 1,347              | 821               | 526                   |        | 1,347              | 1,060              | 287                   |       |
| Age on admission (median [IQR])                             |        |               | 78 [69, 84]        | 77.36 [68, 83]    | 79 [70, 85]           | 0.01   | 78 [69, 84]        | 78 [69, 84]        | 79 [70, 85]           | 0.107 |
| Sex (Female %)                                              |        |               | 761 (56.5)         | 450 (54.8)        | 311 (59.1)            | 0.133  | 761 (56.5)         | 600 (56.6)         | 161 (56.1)            | 0.931 |
| NIHSS on admission (median [IQR])                           |        | 16 (1.2)      | 16 [11, 20]        | 17 [12, 21]       | 15 [10, 20]           | 0.001  | 16 [11, 20]        | 17 [11, 20]        | 16 [10, 20]           | 0.118 |
| Anticoagulation (%)                                         | None   | 61 (4.5)      | 944 (73.4)         | 575 (75.0)        | 369 (71.1)            | 0.002  | 944 (73.4)         | 746 (74.4)         | 198 (70.0)            | 0.302 |
|                                                             | DOAC   |               | 67 ( 5.2)          | 49 ( 6.4)         | 18 ( 3.5)             |        | 67 ( 5.2)          | 49 ( 4.9)          | 18 ( 6.4)             |       |
|                                                             | VKA    |               | 275 (21.4)         | 143 (18.6)        | 132 (25.4)            |        | 275 (21.4)         | 208 (20.7)         | 67 (23.7)             |       |
| Antiplatelet (%)                                            | None   | 55 (4.1)      | 869 (67.3)         | 513 (66.7)        | 356 (68.1)            | 0.087  | 869 (67.3)         | 669 (66.5)         | 200 (69.9)            | 0.126 |
|                                                             | Mono   |               | 400 (31.0)         | 247 (32.1)        | 153 (29.3)            |        | 400 (31.0)         | 322 (32.0)         | 78 (27.3)             |       |
|                                                             | Double |               | 23 ( 1.8)          | 9 ( 1.2)          | 14 ( 2.7)             |        | 23 ( 1.8)          | 15 ( 1.5)          | 8 ( 2.8)              |       |
| Statin (Yes %)                                              |        | 145 (10.8)    | 386 (32.1)         | 221 (32.4)        | 165 (31.8)            | 0.884  | 386 (32.1)         | 300 (32.6)         | 86 (30.5)             | 0.554 |
| Diabetes ( Yes %)                                           |        | 10 (0.7)      | 285 (21.3)         | 145 (17.8)        | 140 (26.9)            | <0.001 | 285 (21.3)         | 226 (21.5)         | 59 (20.7)             | 0.838 |
| Hypertension (Yes %)                                        |        | 7 (0.5)       | 989 (73.8)         | 579 (70.9)        | 410 (78.4)            | 0.003  | 989 (73.8)         | 781 (74.0)         | 208 (73.2)            | 0.866 |
| Dyslipidemia (Yes %)                                        |        | 14 (1)        | 618 (46.4)         | 383 (47.1)        | 235 (45.3)            | 0.564  | 618 (46.4)         | 493 (47.0)         | 125 (44.0)            | 0.408 |
| Smoking (Yes %)                                             |        | 55 (4.1)      | 223 (17.3)         | 155 (19.9)        | 68 (13.2)             | 0.002  | 223 (17.3)         | 180 (17.8)         | 43 (15.4)             | 0.388 |
| Previous stroke (Yes %)                                     |        | 238 (17.7)    | 174 (15.7)         | 115 (14.1)        | 59 (20.3)             | 0.002  | 174 (15.7)         | 126 (14.9)         | 48 (18.4)             | 0.258 |
| Systolic blood pressure on admission (mmHg) (median [IQR])  |        | 358 (26.6)    | 150 [133, 167]     | 150 [133, 167]    | 150 [133, 168.]       | 0.865  | 150 [133, 167]     | 150 [133, 167]     | 150 [134, 168]        | 0.57  |
| Diastolic blood pressure on admission (mmHg) (median [IQR]) |        | 361 (26.8)    | 81 [70, 94]        | 81 [70, 93]       | 80 [70, 95]           | 0.637  | 81 [70, 94]        | 80 [70, 93]        | 83 [70, 95]           | 0.264 |
| Glucose on admission (mmol/L) (median [IQR])                |        | 335 (24.9)    | 7.40 [6.11, 10.67] | 6.80 [5.90, 8.30] | 12.90 [6.80, 124.00]  | <0.001 | 7.40 [6.11, 10.67] | 7.50 [6.20, 11.70] | 7.10 [6.00, 9.00]     | 0.014 |
| INR on admission (median [IQR])                             |        | 437 (32.4)    | 1.06 [1.00, 1.20]  | 1.06 [1.00, 1.19] | 1.08 [1.00, 1.20]     | 0.842  | 1.06 [1.00, 1.20]  | 1.06 [1.00, 1.20]  | 1.07 [1.00, 1.17]     | 0.133 |
| Platelet count on admission (median [IQR])                  |        | 379 (28.1)    | 212 [171, 264]     | 206 [167, 254]    | 224 [176, 280]        | <0.001 | 212 [171, 264]     | 210 [168, 262]     | 224 [178, 279]        | 0.027 |

mRS: modified Rankin Scale; NIHSS: National Institutes of Health Stroke Scale; DOAC: Direct Oral Anticoagulants; VKA: Vitamin-K Antagonists; INR: International Normalized Ratio.

## 6 Supplementary Table 4 Unadjusted Analysis With Symptomatic Intracranial Hemorrhage as the Outcome Variable

| Variable           | sICH               |                  |
|--------------------|--------------------|------------------|
|                    | OR [95% CI]        | P-value          |
| Age                | 0.99 [0.98 – 1.00] | 0.167            |
| Sex (Male)         | 1.14 [0.83 – 1.57] | 0.409            |
| NIHSS on admission | 1.04 [1.02 – 1.06] | <b>&lt;0.001</b> |
| Diabetes           | 1.23 [0.83 – 1.78] | 0.289            |
| Hypertension       | 0.82 [0.59 – 1.14] | 0.233            |
| Dyslipidemia       | 0.79 [0.57 – 1.10] | 0.17             |
| Smoking            | 0.96 [0.65 – 1.41] | 0.863            |
| DOAC               | 1.08 [0.42 – 2.32] | 0.852            |
| VKA                | 1.58 [1.00 – 2.43] | <b>0.041</b>     |
| IVT                | 1.19 [0.86 – 1.64] | 0.281            |
| AF                 | 0.93 [0.67 – 1.28] | 0.673            |

sICH: symptomatic intracranial hemorrhage; OR: Odds Ratios; CI: confidence interval; NIHSS: National Institutes of Health Stroke Scale; DOAC: Direct Oral Anticoagulants; VKA: Vitamin K Antagonists; IVT: Intravenous Thrombolysis; AF: Atrial Fibrillation.

7 Supplementary Table 5 Analysis With Symptomatic Intracranial Hemorrhage as the Outcome Variable Unadjusted for Oral Anticoagulants

| Predictor          | sICH                 |             |                  |
|--------------------|----------------------|-------------|------------------|
|                    | Adjusted Odds Ratios | 95% CI      | P-Value          |
| Age                | 1.00                 | 0.98 – 1.01 | 0.513            |
| Sex                | 1.24                 | 0.87 – 1.75 | 0.233            |
| NIHSS On Admission | 1.04                 | 1.02 – 1.07 | <b>&lt;0.001</b> |
| Diabetes           | 1.32                 | 0.85 – 2.00 | 0.207            |
| Hypertension       | 0.75                 | 0.50 – 1.12 | 0.157            |
| Dyslipidemia       | 0.79                 | 0.55 – 1.13 | 0.197            |
| Smoking            | 0.86                 | 0.55 – 1.29 | 0.473            |
| IVT                | 1.08                 | 0.68 – 1.72 | 0.736            |
| AF                 | 0.91                 | 0.55 – 1.50 | 0.704            |
| AF*IVT interaction | 1.13                 | 0.57 – 2.25 | 0.716            |
| $\Delta R^2$       | 0.01                 |             |                  |

sICH: symptomatic intracranial hemorrhage; CI: confidence interval; NIHSS: National Institutes of Health Stroke Scale; IVT: Intravenous Thrombolysis; AF: Atrial Fibrillation.

**8 Supplementary Table 6 Sensitivity Analysis of International Normalized Ratio on Outcome of Patients Under Vitamin-K Antagonist Therapy**

| Predictor                                                                 | sICH                 |               |              |
|---------------------------------------------------------------------------|----------------------|---------------|--------------|
|                                                                           | Adjusted Odds Ratios | 95% CI        | P-Value      |
| Age                                                                       | 1.05                 | 0.97 – 1.16   | 0.284        |
| Sex                                                                       | 0.47                 | 0.03 – 4.88   | 0.547        |
| NIHSS On Admission                                                        | 1.12                 | 0.97 – 1.31   | 0.128        |
| Diabetes                                                                  | 0.43                 | 0.02 – 3.65   | 0.489        |
| Hypertension                                                              | 0.29                 | 0.02 – 7.64   | 0.376        |
| Dyslipidemia                                                              | 1.21                 | 0.14 – 12.98  | 0.860        |
| Smoking                                                                   | 27.12                | 2.15 – 667.52 | <b>0.017</b> |
| INR per 0.1 increase (INR up to, and with, 1.6 included in this analysis) | 1.28                 | 0.71 – 2.49   | 0.414        |
| $\Delta R^2$                                                              | 0.11                 |               |              |

sICH: Symptomatic Intracranial Hemorrhage; CI: confidence interval; NIHSS: National Institutes of Health Stroke Scale; INR: International Normalized Ratio.



9 Supplementary Table 7 Ordinal Regression With Modified Rankin Scale Score at 3 months as the Outcome Variable

| Predictor          | Modified Rankin Scale Score at 3 months |             |                |
|--------------------|-----------------------------------------|-------------|----------------|
|                    | Adjusted Odds Ratios                    | 95% CI      | P-Value        |
| Age                | 1.04                                    | 1.03 – 1.05 | < <b>0.001</b> |
| Sex                | 1.06                                    | 0.85 – 1.32 | 0.617          |
| NIHSS On Admission | 1.09                                    | 1.08 – 1.11 | < <b>0.001</b> |
| Diabetes           | 1.68                                    | 1.28 – 2.22 | < <b>0.001</b> |
| Hypertension       | 0.94                                    | 0.72 – 1.24 | 0.676          |
| Dyslipidemia       | 0.74                                    | 0.59 – 0.93 | <b>0.008</b>   |
| Smoking            | 1.17                                    | 0.87 – 1.59 | 0.292          |
| DOAC               | 0.66                                    | 0.39 – 1.09 | 0.109          |
| VKA                | 1.22                                    | 0.91 – 1.64 | 0.175          |
| IVT                | 0.74                                    | 0.58 – 0.93 | <b>0.011</b>   |

CI: confidence interval; NIHSS: National Institutes of Health Stroke Scale; DOAC: Direct Oral Anticoagulants; VKA: Vitamin K Antagonists; IVT: Intravenous Thrombolysis.

## 10 Supplementary Table 8 Main Outcomes of Interest With Excluded Patients From One Center Which Was Not Part of the BEYOND-SWIFT Registry

| Predictors         | sICH                 |             |              | mRS 0-2 at 90-Days   |             |              |
|--------------------|----------------------|-------------|--------------|----------------------|-------------|--------------|
|                    | Adjusted Odds Ratios | 95% CI      | P-Value      | Adjusted Odds Ratios | 95% CI      | P-Value      |
| Age                | 1.00                 | 0.98 – 1.01 | 0.727        | 0.96                 | 0.95 – 0.97 | <0.001       |
| Sex (Male)         | 1.47                 | 1.00 – 2.20 | 0.053        | 0.93                 | 0.75 – 1.16 | 0.530        |
| NIHSS on Admission | 1.04                 | 1.01 – 1.06 | <b>0.004</b> | 0.91                 | 0.90 – 0.93 | <0.001       |
| Diabetes           | 1.43                 | 0.86 – 2.31 | 0.150        | 0.56                 | 0.41 – 0.76 | <0.001       |
| Hypertension       | 0.72                 | 0.46 – 1.12 | 0.138        | 1.34                 | 1.03 – 1.75 | <b>0.030</b> |
| Dyslipidemia       | 0.79                 | 0.53 – 1.17 | 0.242        | 1.48                 | 1.18 – 1.86 | <b>0.001</b> |
| Smoking            | 0.83                 | 0.52 – 1.31 | 0.436        | 1.08                 | 0.84 – 1.39 | 0.542        |
| DOAC               | 1.00                 | 0.30 – 2.57 | 0.993        | 1.41                 | 0.79 – 2.50 | 0.240        |
| VKA                | 2.45                 | 1.35 – 4.29 | <b>0.002</b> | 0.69                 | 0.47 – 1.00 | <b>0.050</b> |
| IVT                | 1.26                 | 0.76 – 2.11 | 0.368        | 1.46                 | 1.09 – 1.95 | <b>0.012</b> |
| AF                 | 0.70                 | 0.38 – 1.26 | 0.239        | 1.33                 | 0.96 – 1.85 | 0.086        |
| AF*IVT interaction | 1.32                 | 0.60 – 2.89 | 0.488        | 1.07                 | 0.69 – 1.67 | 0.756        |
| $\Delta R^2$       | 0.01                 |             |              | 0.18                 |             |              |

sICH: symptomatic intracranial hemorrhage; mRS: Modified Rankin Scale; CI: confidence interval; NIHSS: National Institutes of Health Stroke Scale; ; DOAC: Direct Oral Anticoagulants; VKA: Vitamin K Antagonists; IVT: Intravenous Thrombolysis; AF: Atrial Fibrillation.

11 Supplementary Table 9 Regression Models for Main Outcomes of Interest With Added TICI Score

| Predictors         | sICH                 |             |                | mRS 0-2              |             |                |
|--------------------|----------------------|-------------|----------------|----------------------|-------------|----------------|
|                    | Adjusted Odds Ratios | 95% CI      | P-Value        | Adjusted Odds Ratios | 95% CI      | P-Value        |
| Age                | 1.00                 | 0.98 – 1.01 | 0.700          | 0.96                 | 0.95 – 0.97 | <0.001         |
| Sex (Male)         | 1.55                 | 1.04 – 2.31 | <b>0.031</b>   | 0.88                 | 0.70 – 1.11 | 0.282          |
| NIHSS on admission | 1.04                 | 1.01 – 1.06 | <b>0.006</b>   | 0.91                 | 0.90 – 0.93 | <0.001         |
| Diabetes           | 1.37                 | 0.82 – 2.21 | 0.211          | 0.58                 | 0.42 – 0.79 | <b>0.001</b>   |
| Hypertension       | 0.71                 | 0.46 – 1.12 | 0.135          | 1.35                 | 1.04 – 1.78 | <b>0.027</b>   |
| Dyslipidemia       | 0.81                 | 0.54 – 1.21 | 0.298          | 1.50                 | 1.19 – 1.90 | <b>0.001</b>   |
| Smoking            | 0.85                 | 0.53 – 1.34 | 0.501          | 1.06                 | 0.82 – 1.38 | 0.637          |
| DOAC               | 1.08                 | 0.32 – 2.77 | 0.889          | 1.25                 | 0.70 – 2.24 | 0.451          |
| VKA                | 2.30                 | 1.27 – 4.03 | <b>0.005</b>   | 0.71                 | 0.47 – 1.05 | 0.087          |
| TICI 2b-3          | 0.44                 | 0.29 – 0.69 | < <b>0.001</b> | 3.93                 | 2.79 – 5.62 | < <b>0.001</b> |
| IVT                | 1.27                 | 0.76 – 2.14 | 0.352          | 1.47                 | 1.09 – 1.98 | <b>0.013</b>   |
| AF                 | 0.75                 | 0.41 – 1.35 | 0.340          | 1.29                 | 0.92 – 1.80 | 0.141          |
| AF*IVT interaction | 1.31                 | 0.60 – 2.87 | 0.504          | 1.06                 | 0.67 – 1.66 | 0.813          |
| $\Delta R^2$       | 0.02                 |             |                | 0.23                 |             |                |

sICH: symptomatic intracranial hemorrhage; mRS: Modified Rankin Scale; CI: confidence interval; NIHSS: National Institutes of Health Stroke Scale; ; DOAC: Direct Oral Anticoagulants; VKA: Vitamin K Antagonists; TICI: Thrombolysis in Cerebral Infarction; IVT: Intravenous Thrombolysis; AF: Atrial Fibrillation.
